# Supplementary material
Source: publisher site journal article supplement (https://www.dovepress.com/article/supplementary_file/565339/Supplementary%20Table%25E2%2580%25AFS1.xlsx)
Supplement: Supplementary file 1 [file Supplementary%20Table%25E2%2580%25AFS1.xlsx]

## Sheet: Sheet1
Supplementary Table S1.Genome assembly statistics for the seven CRKP isolates collected from a single patient.
Strain ID	Largest Contig (bp)	Total Genome Length (bp)	N50 (bp)	GC Content (%)	Isolation Source	Genome Coverage (×)
CRKP17	450374	5724821	113851	57.1	Sputum	189.65
CRKP22	322278	5731610	121574	57.09	Sputum	194.32
CRKP24	450369	5724812	113851	57.1	BALF	201.78
CRKP36	5463404	5882922	5463404	57.02	Sputum	207.49
CRKP55	5465314	5889541	5465314	57.01	BALF	185.27
CRKP86	262930	5695887	84833	57.12	Sputum	198.06
CRKP103	5525891	5876805	5525891	57.02	Sputum	209.14
